# Supplementary material for: Quantitative Tandem Affinity Purification, an Effective Tool to Investigate Protein Complex Composition in Plant Hormone Signaling: Strigolactones in the Spotlight
Source: PubMed Central journal article supplement (PMC5932160; doi:10.3389/fpls.2018.00528), 2018-04-26
Supplement: Table_1.pdf [file Table_1.pdf]

**Supplemental Table 1. Primers used in this study**

| <b>Gene name</b>          | <b>Primers</b>                                          | <b>Use</b>  |
|---------------------------|---------------------------------------------------------|-------------|
| <i>SMXL7-Fw</i>           | GGGGACAAGTTTGTACAAAAAAGCAGGCTCAATGCCGACACCAGTAACCACG    | Cloning     |
| <i>SMXL7-Rev1</i>         | GGGGACCACTTTGTACAAGAAAGCTGGGTATCAGATCACTTCGACTCTCG      | Cloning     |
| <i>SMXL7-Rev2</i>         | GGGGACCACTTTGTACAAGAAAGCTGGGTAGATCACTTCGACTCTCG         | Cloning     |
| $\Delta$ <i>SMXL7-Fw</i>  | CACAAGACAGTCTTGACGATAGATTACAGATTACATTGCTGGCGAAGTGGCGAG  | Mutagenesis |
| $\Delta$ <i>SMXL7-Rev</i> | CGCCACTTCGCCAGCAATGTAATCTGTGAATCTATCGTCAAGACTGTCTTGTGAC | Mutagenesis |
| <i>D14-Fw</i>             | GGGGACAAGTTTGTACAAAAAAGCAGGCTCAATGAGTCAACACAACATCTTAG   | Cloning     |
| <i>D14-Rev</i>            | GGGGACCACTTTGTACAAGAAAGCTGGGTATCACCGAGGAAGAGCTCGCCG     | Cloning     |

**Supplemental Table 2: MaxQuant search parameters**

| Parameter                                        | Value                                  |
|--------------------------------------------------|----------------------------------------|
| Version                                          | 1.4.1.2                                |
| Fixed modifications                              | Carbamidomethyl (C)                    |
| Decoy mode                                       | revert                                 |
| Special Aas                                      | KR                                     |
| Include contaminants                             | TRUE                                   |
| MS/MS tol. (FTMS)                                | 20 ppm                                 |
| Top MS/MS peaks per 100 Da. (FTMS)               | 12                                     |
| MS/MS deisotoping (FTMS)                         | TRUE                                   |
| MS/MS tol. (ITMS)                                | 0.5 Da                                 |
| Top MS/MS peaks per 100 Da. (ITMS)               | 8                                      |
| MS/MS deisotoping (ITMS)                         | FALSE                                  |
| MS/MS tol. (TOF)                                 | 0.1 Da                                 |
| Top MS/MS peaks per 100 Da. (TOF)                | 10                                     |
| MS/MS deisotoping (TOF)                          | FALSE                                  |
| MS/MS tol. (Unknown)                             | 0.5 Da                                 |
| Top MS/MS peaks per 100 Da. (Unknown)            | 10                                     |
| MS/MS deisotoping (Unknown)                      | FALSE                                  |
| PSM FDR                                          | 0.01                                   |
| Protein FDR                                      | 0.01                                   |
| Site FDR                                         | 0.01                                   |
| Use Normalized Ratios For Occupancy              | TRUE                                   |
| Min. peptide Length                              | 7                                      |
| Min. score for unmodified peptides               | 0                                      |
| Min. score for modified peptides                 | 40                                     |
| Min. delta score for unmodified peptides         | 0                                      |
| Min. delta score for modified peptides           | 17                                     |
| Min. unique peptides                             | 1                                      |
| Min. razor peptides                              | 1                                      |
| Min. peptides                                    | 1                                      |
| Use only unmodified peptides and                 | TRUE                                   |
| Modifications included in protein quantification | Acetyl (protein N-term); oxidation (M) |
| Peptides used for protein quantification         | Unique                                 |
| Discard unmodified counterpart peptides          | TRUE                                   |
| Min. ratio count                                 | 1                                      |
| Site quantification                              | Use least modified peptide             |
| Re-quantify                                      | TRUE                                   |
| Use delta score                                  | FALSE                                  |
| Ibaq                                             | FALSE                                  |
| iBAQ log fit                                     | FALSE                                  |

|                              |                         |
|------------------------------|-------------------------|
| MS/MS recalibration          | FALSE                   |
| Match between runs           | TRUE                    |
| Matching time window [min]   | 0.5                     |
| Alignment time window [min]  | 20                      |
| Find dependent peptides      | FALSE                   |
| Fasta file                   | TAIR10_pep_20101214     |
| Labeled amino acid filtering | TRUE                    |
| Site tables                  | Oxidation (M) sites.txt |
| Cut peaks                    | TRUE                    |
| Decoy mode                   | Revert                  |
| Special Aas                  | KR                      |
| Include contaminants         | TRUE                    |
| RT shift                     | FALSE                   |
| Advanced ratios              | FALSE                   |
| AIF correlation              | 0.47                    |
| First pass AIF correlation   | 0.8                     |
| AIF topx                     | 20                      |
| AIF min mass                 | 0                       |
| AIF SIL weight               | 4                       |
| AIF ISO weight               | 2                       |
| AIF iterative                | TRUE                    |
| AIF threshold FDR            | 0.01                    |

**Supplemental Table 3. Proteins found significantly different between mock and treatment in SMXL7 TAP.** *t* test analysis results from the Perseus software on a set of four independent TAP experiments on both mock and *rac*-GR24 treatment after intensity based normalization for bait.

| AGI code    | Name                                                      | <i>P</i> value |
|-------------|-----------------------------------------------------------|----------------|
| AT3G03990.1 | $\alpha/\beta$ -Hydrolases superfamily protein            | 1.62E-05       |
| AT4G02570.4 | Cullin 1                                                  | 2.55E-05       |
| AT1G53750.1 | Regulatory particle triple-A 1A                           | 0.0014         |
| AT5G35360.1 | Acetyl Co-enzyme a carboxylase biotin carboxylase subunit | 0.0016         |
| AT5G16390.2 | Chloroplastic acetylcoenzyme A carboxylase 1              | 0.0017         |
| AT2G35635.1 | Ubiquitin 7                                               | 0.0021         |
| AT5G26860.1 | Ion protease 1                                            | 0.0027         |
| AT5G03850.1 | Nucleic acid-binding, OB-fold-like protein                | 0.0029         |
| AT5G23540.2 | Mov34/MPN/PAD-1 family protein                            | 0.0035         |
| AT5G56030.1 | Heat shock protein 81-2                                   | 0.0037         |
| AT4G29040.1 | Regulatory particle AAA-ATPase 2A                         | 0.0040         |
| AT5G20000.1 | AAA-type ATPase family protein                            | 0.0044         |
| AT5G49910.1 | Chloroplast heat shock protein 70-2                       | 0.0046         |
| AT3G05530.1 | Regulatory particle triple-A ATPase 5A                    | 0.0052         |
| AT3G04120.1 | Glyceraldehyde-3-phosphate dehydrogenase C subunit 1      | 0.0054         |
| AT4G24280.1 | Chloroplast heat shock protein 70-1                       | 0.0059         |
| AT5G43010.1 | Regulatory particle triple-A ATPase 4A                    | 0.0069         |
| AT5G18230.1 | Transcription regulator NOT2/NOT3/NOT5 family protein     | 0.0072         |
| AT3G59540.1 | Ribosomal L38e protein family                             | 0.0075         |
| AT5G02500.1 | Heat shock cognate protein 70-1                           | 0.0081         |
| AT1G72370.2 | 40s Ribosomal protein SA                                  | 0.0081         |
| AT1G71410.1 | ARM repeat superfamily protein                            | 0.0091         |
| AT5G05620.1 | $\gamma$ -Tubulin complex protein 2                       | 0.0120         |
| AT3G16830.1 | TOPLESS-related 2                                         | 0.0125         |
| AT2G20580.1 | 26S Proteasome regulatory subunit S2 1A                   | 0.0139         |
| AT3G43300.2 | HOPM interactor 7                                         | 0.0146         |
| AT1G02080.2 | Transcription regulators                                  | 0.0147         |
| AT3G18190.1 | TCP-1/cpn60 chaperonin family protein                     | 0.0152         |
| AT3G08530.1 | Clathrin, heavy chain                                     | 0.0164         |
| AT2G36160.1 | Ribosomal protein S11 family protein                      | 0.0172         |
| AT3G09440.2 | Heat shock protein 70 (Hsp 70) family protein             | 0.0182         |
| AT1G71380.1 | Cellulase 3                                               | 0.0195         |
| AT3G53020.1 | Ribosomal protein L24e family protein                     | 0.0251         |
